# Supplementary material for: Metabolomics and eicosanoid analysis identified serum biomarkers for distinguishing hepatocellular carcinoma from hepatitis B virus-related cirrhosis
Source: PubMed Central journal article supplement (PMC5609970; doi:10.18632/oncotarget.19173), 2017-07-10
Supplement: oncotarget-08-63890-s001.pdf [file oncotarget-08-63890-s001.pdf]

## Metabolomics and eicosanoid analysis identified serum biomarkers for distinguishing hepatocellular carcinoma from hepatitis B virus-related cirrhosis

### SUPPLEMENTARY MATERIALS

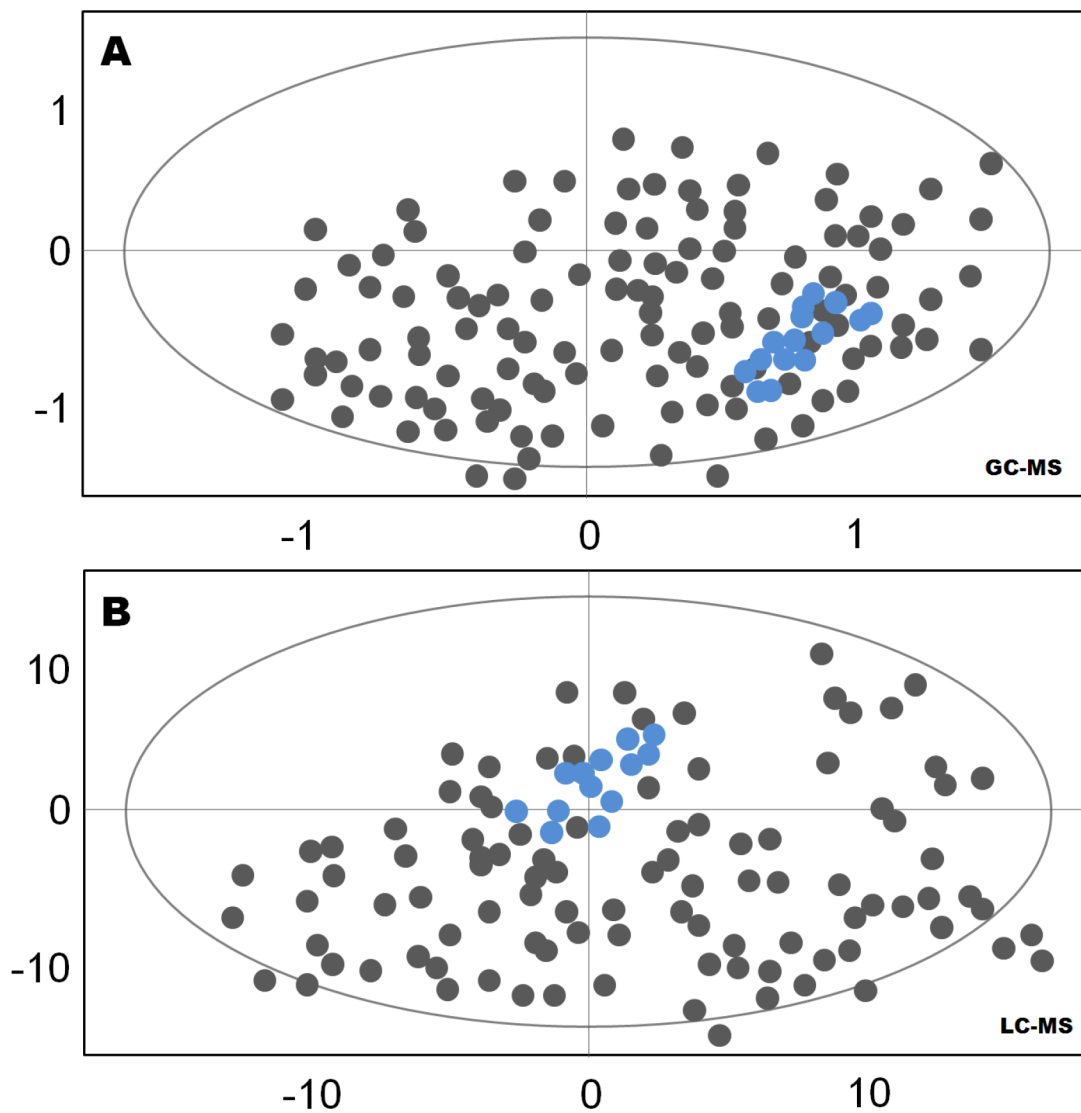

Supplementary Figure 1: The PCA scores plot for QC sample (●) and the other samples (●), showing that the QC samples cluster together. (A) GC-MS; (B) LC-MSI.

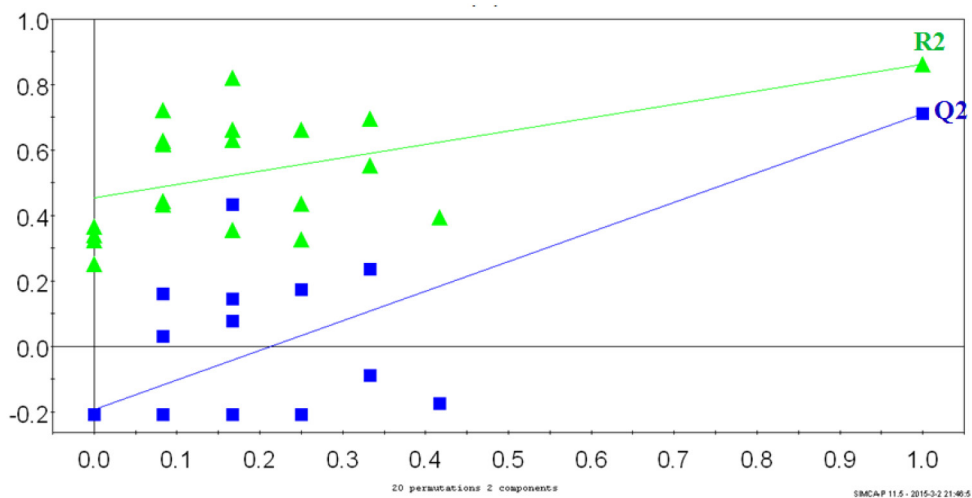

Supplementary Figure 2: Validation plot obtained from permutation test (n = 20).

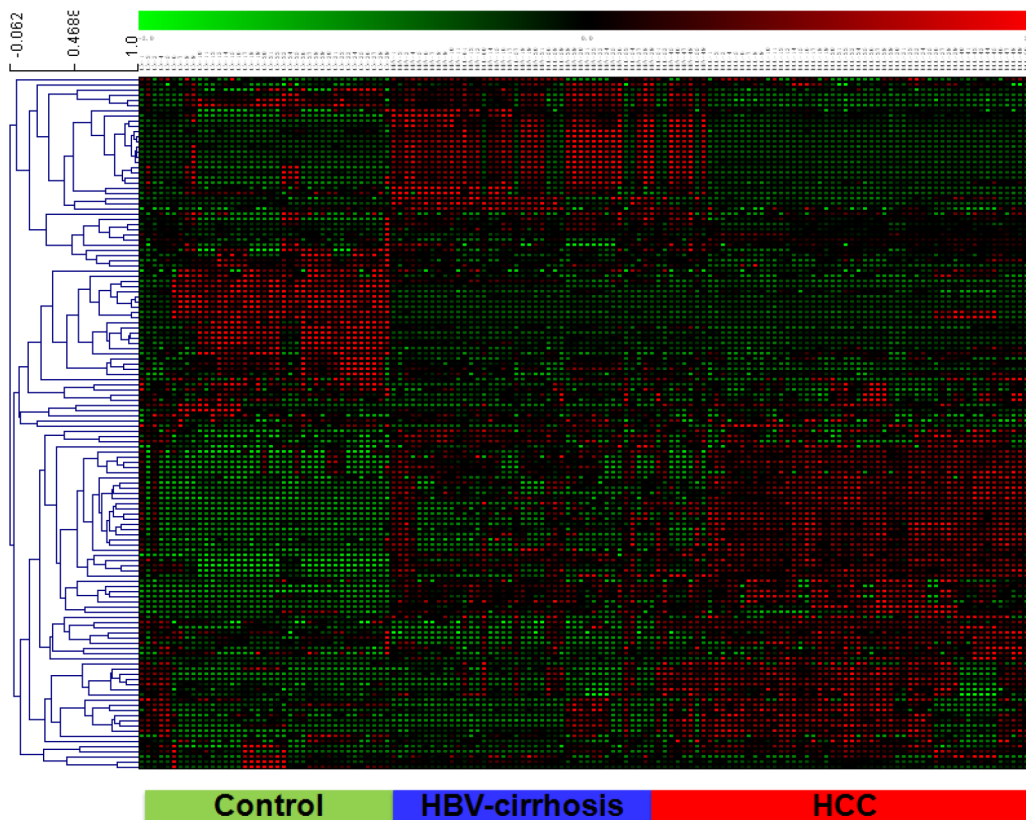

Supplementary Figure 3: Heat map based on the Pearson distance measure and the Ward cluster algorithm for healthy, HBV-cirrhosis and HCC groups. Red color indicates high level of metabolites and green color indicates a low level of metabolites, while black means an equal level groups.

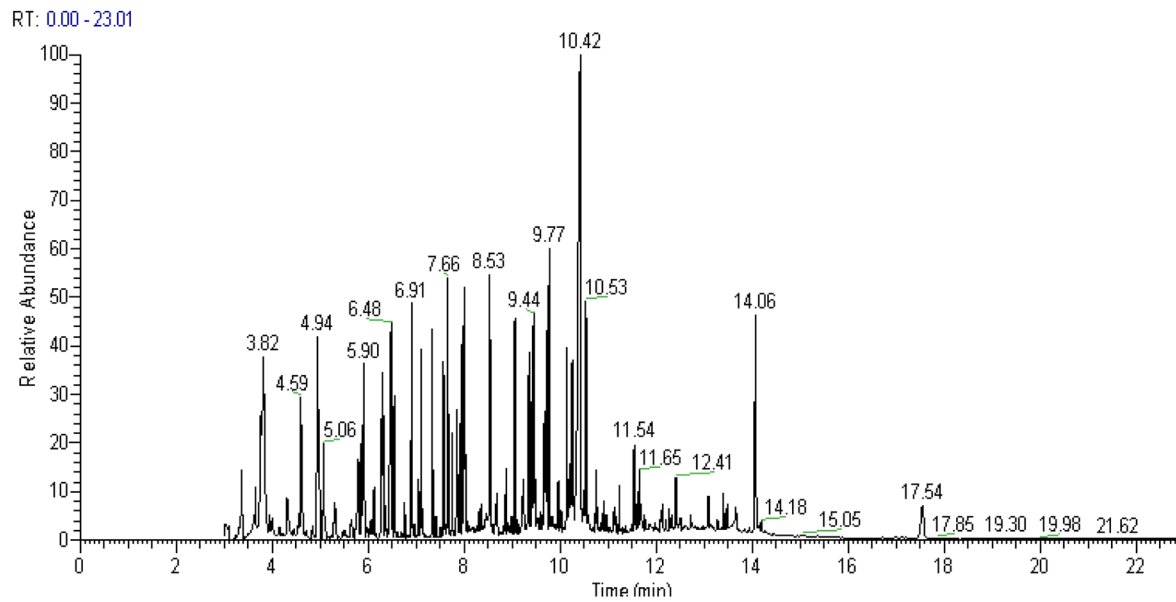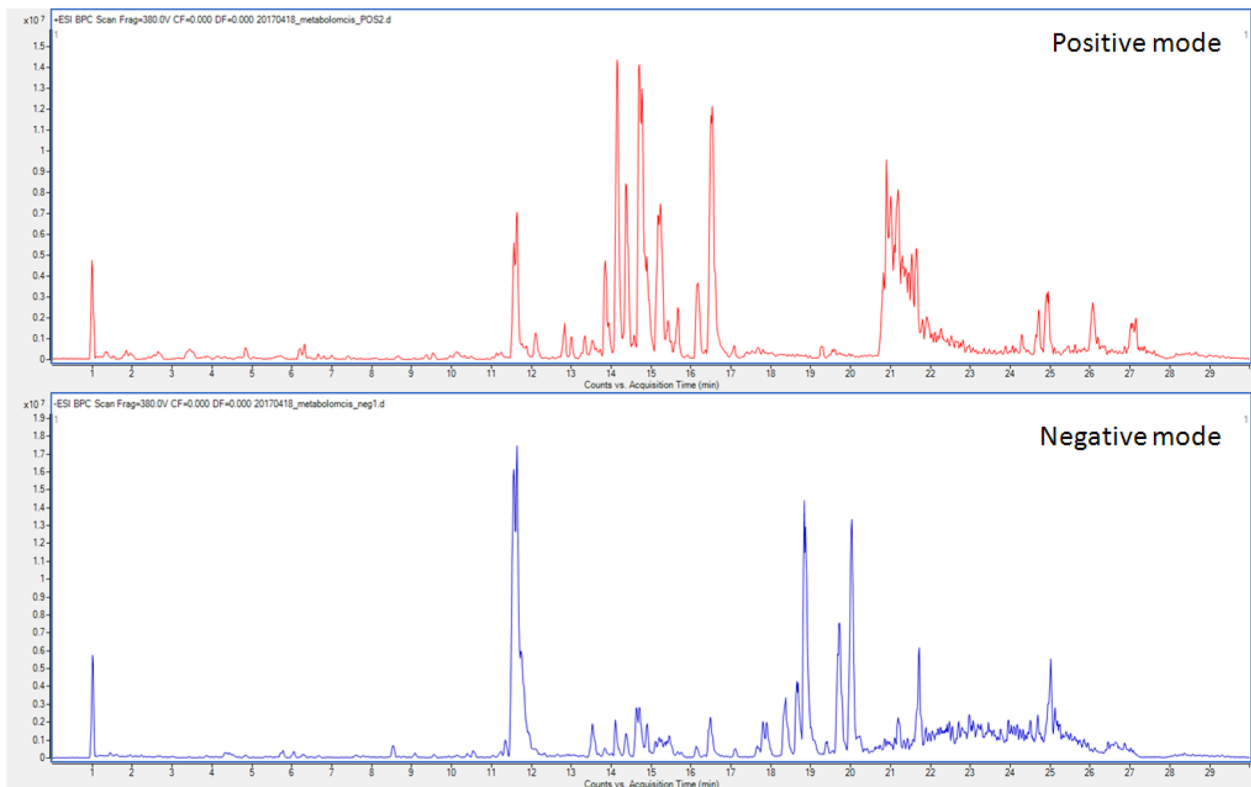

Supplementary Figure 4: The representative TIC chromatography of GC-MS and LC-MS analysis.

**Supplementary Table 1: The internal standards used in non-targeted and targeted metabolomics**

|                           | <b>Internal standards</b>                                                                                         |
|---------------------------|-------------------------------------------------------------------------------------------------------------------|
| Non-targeted metabolomics | Carnitin C16:0-d3, Cholic acid-d4, chenodeoxycholic acid-d4, tryptophan-d5, arachidonic acid-d8, Palmitic acid-d3 |
| Targeted metabolomics     | PGF2a-d4; TXB2-d4; 9-HODE-d4; 12,13-EpOME-d4; 15-HETE-d8, 9-HODE-d4, 11,12-EET-d11                                |

**Supplementary Table 2: Mass transitions, collision energy, precision and liner range of targeted eicosanoid analysis**

See Supplementary File 1

Supplementary Table 3: Validation of LC-MS assay precision, accuracy and autosampler stability of eicosanoids

| FAs                  | Intra-day precision (n = 6) |        |      | Inter-day precision (n = 6) |        |      | Accuracy (n = 6) |               | 24 hours stability<br>(n =3) |
|----------------------|-----------------------------|--------|------|-----------------------------|--------|------|------------------|---------------|------------------------------|
|                      | RSD (%)                     |        |      | RSD (%)                     |        |      | (%)              |               |                              |
|                      | High                        | Medium | Low  | High                        | Medium | Low  | Intra-<br>day    | Inter-<br>day |                              |
| 6-keto-PGF1 $\alpha$ | 2.48                        | 1.22   | 1.55 | 1.34                        | 7.46   | 2.06 | 99.0             | 113.1         | 100.0                        |
| 8-iso-PGF2 $\alpha$  | 2.97                        | 2.23   | 0.70 | 1.35                        | 1.01   | 2.06 | 98.0             | 110.4         | 92.1                         |
| PGF2 $\alpha$        | 1.82                        | 0.96   | 0.79 | 1.24                        | 0.91   | 2.24 | 97.6             | 109.1         | 90.3                         |
| PGE2                 | 1.82                        | 0.84   | 0.48 | 0.92                        | 1.25   | 2.44 | 97.8             | 107.2         | 93.0                         |
| PGD2                 | 1.94                        | 0.99   | 0.74 | 1.20                        | 1.41   | 2.73 | 99.2             | 100.8         | 94.1                         |
| TXB2                 | 1.93                        | 1.28   | 1.36 | 1.47                        | 1.31   | 2.70 | 98.3             | 104.0         | 94.5                         |
| LTE4                 | 2.19                        | 1.15   | 0.52 | 1.30                        | 1.86   | 2.74 | 99.9             | 96.6          | 94.2                         |
| LTB4                 | 2.08                        | 1.23   | 0.96 | 1.86                        | 1.63   | 2.10 | 98.8             | 100.6         | 94.6                         |
| 5-HEPE               | 2.12                        | 1.41   | 3.91 | 1.82                        | 2.65   | 5.58 | 98.8             | 100.1         | 94.0                         |
| 12-HEPE              | 2.80                        | 1.09   | 4.26 | 2.71                        | 2.06   | 1.61 | 100.9            | 91.5          | 95.5                         |
| 15-HEPE              | 2.59                        | 0.89   | 3.66 | 2.15                        | 13.8   | 2.66 | 101.1            | 91.2          | 93.5                         |
| 5-HETE               | 3.61                        | 1.50   | 2.17 | 2.69                        | 1.54   | 1.74 | 98.7             | 101.6         | 97.0                         |
| 8-HETE               | 2.02                        | 2.30   | 3.57 | 1.81                        | 2.74   | 2.86 | 102.0            | 101.0         | 93.5                         |
| 9-HETE               | 2.81                        | 1.62   | 5.01 | 2.35                        | 2.77   | 1.38 | 100.5            | 87.6          | 97.2                         |
| 12-HETE              | 2.36                        | 1.85   | 3.44 | 2.67                        | 2.10   | 1.69 | 100.6            | 86.6          | 93.8                         |
| 15-HETE              | 3.04                        | 2.50   | 3.53 | 2.10                        | 2.01   | 1.65 | 101.7            | 91.4          | 97.1                         |
| 20-HETE              | 2.58                        | 1.75   | 6.93 | 1.99                        | 2.01   | 3.05 | 102.0            | 91.0          | 93.5                         |
| 5,6-EET              | 2.53                        | 2.88   | 3.78 | 2.56                        | 1.75   | 1.79 | 100.5            | 90.2          | 95.9                         |
| 8,9-EET              | 1.44                        | 4.09   | 2.40 | 1.57                        | 2.01   | 1.33 | 100.6            | 88.4          | 95.6                         |
| 11,12-EET            | 2.53                        | 3.84   | 8.43 | 2.19                        | 2.06   | 1.60 | 101.7            | 83.2          | 97.8                         |
| 14,15-EET            | 2.69                        | 2.67   | 6.84 | 2.45                        | 2.18   | 1.62 | 101.8            | 83.4          | 96.3                         |
| 9-HODE               | 2.05                        | 1.93   | 2.14 | 2.35                        | 2.06   | 1.73 | 101.0            | 89.4          | 96.8                         |
| 13-HODE              | 2.56                        | 1.84   | 4.00 | 1.83                        | 1.91   | 1.60 | 101.0            | 90.2          | 98.5                         |
| 9,10-DiHOME          | 2.33                        | 2.18   | 3.48 | 1.97                        | 1.46   | 5.43 | 101.6            | 89.7          | 93.5                         |
| 12,13-DiHOME         | 1.87                        | 2.12   | 6.00 | 1.21                        | 1.60   | 2.68 | 100.9            | 89.7          | 97.8                         |
| 9,10-EpOME           | 2.72                        | 1.10   | 6.36 | 1.80                        | 1.71   | 1.61 | 101.8            | 87.9          | 96.6                         |
| 12,13-EpOME          | 1.93                        | 3.07   | 7.65 | 1.90                        | 1.78   | 3.02 | 101.6            | 88.1          | 94.7                         |
| 11,12-DiHETrE        | 3.22                        | 8.17   | 6.23 | 1.46                        | 7.76   | 5.36 | 101.9            | 87.3          | 95.7                         |
| 14,15-DiHETrE        | 8.64                        | 1.82   | 5.23 | 4.98                        | 1.88   | 3.74 | 101.8            | 94.4          | 96.8                         |
| 5-OxoETE             | 2.52                        | 3.35   | 7.82 | 2.13                        | 2.08   | 2.27 | 101.1            | 88.0          | 93.9                         |

Supplementary Table 4: Recoveries of internal standards

|                | Recovery (%) |        |      |
|----------------|--------------|--------|------|
|                | High         | Medium | Low  |
| PGF2a-d4       | 71.7         | 66.5   | 68.6 |
| TXB2-d4        | 88.3         | 74.9   | 77.1 |
| 9-HODE-d4      | 94.7         | 69.3   | 72.2 |
| 12,13-EpOME-d4 | 71.8         | 61.5   | 73.2 |
| 15-HETE-d8     | 66.0         | 70.7   | 69.0 |
| 9-HODE-d4      | 90.2         | 68.8   | 65.4 |
| 11,12-EET-d11  | 82.3         | 86.1   | 70.2 |

Supplementary Table 5: Identification information for LC-MS metabolites

| Metabolites           | RT (min) | MS1                |                    | MS2                 |
|-----------------------|----------|--------------------|--------------------|---------------------|
|                       |          | Calculated (Da)    | Detected (Da)      |                     |
| Positive              |          | [M+H] <sup>+</sup> | [M+H] <sup>+</sup> |                     |
| Glycerol 3-phosphate  | 1.1      | 173.0209           | 173.0212           | 151.2, 119.3, 78.9  |
| Malate                | 0.8      | 135.0287           | 135.0278           | 99.0, 71.0, 43.1    |
| Creatinine            | 1.1      | 114.1251           | 114.1255           | 44.1                |
| Proline               | 0.9      | 116.1377           | 116.1370           | 70.2                |
| Ornithine             | 1.2      | 133.0970           | 133.0976           | 70.3                |
| Choline               | 0.7      | 105.1147           | 105.1141           | 61.2                |
| Carnitine             | 1.1      | 162.1124           | 162.1130           | 102.4, 84.5, 59.4   |
| Carnitine (10:0)      | 4.5      | 317.2553           | 317.2560           | 102.4, 84.5         |
| Cholesterol           | 5.4      | 387.3621           | 387.3624           | 371.3, 369.35       |
| Cortol                | 5.5      | 369.2634           | 369.2637           | 351.2, 333.2        |
| Cortisol              | 5.9      | 363.2166           | 363.2161           | 345.2, 121.2        |
| MG (14:0)             | 10.2     | 303.2529           | 303.2525           | 257.2, 239.1,       |
| DG (30:0)             | 10.3     | 541.4826           | 541.4831           | 413.2, 352.9, 273.2 |
| DG (32:1)             | 10.4     | 567.4982           | 567.4985           | 499.2, 413.2, 301.2 |
| DG (40:4)             | 10.6     | 678.6074           | 678.6075           | 619.1, 380.5, 301.2 |
| TG (47:0)             | 13.2     | 793.7279           | 793.7276           | 640.2, 542.2        |
| TG (50:2)             | 14.3     | 831.7435           | 831.7433           | 651.1, 342.2        |
| LPC (14:0)            | 9.7      | 468.3083           | 468.3085           | 400.3, 184.1, 104.1 |
| LPC (16:0)            | 10.2     | 496.3397           | 496.3395           | 478.3, 184.1, 104.2 |
| LPC (16:1)            | 10.1     | 494.3240           | 494.3243           | 476.2, 184.1, 104.3 |
| LPC (18:0)            | 12.3     | 524.3710           | 524.3711           | 506.2, 184.2, 104.1 |
| PC (32:0)             | 15.7     | 734.5693           | 734.5689           | 716.2, 184.1, 104.1 |
| PC (40:5)             | 16.9     | 836.6163           | 836.6165           | 818.2, 184.2, 104.1 |
| PC (42:2)             | 17.3     | 870.6945           | 870.6847           | 852.2, 184.1        |
| PC (30:5)             | 17.4     | 808.5850           | 808.5852           | 790.2, 184.1        |
| PC (40:6)             | 17.4     | 834.6007           | 834.6010           | 816.2, 184.2, 104.1 |
| PC (42:7)             | 17.6     | 860.6163           | 860.6162           | 842.3, 184.1, 104.1 |
| Negative              |          | [M-H] <sup>-</sup> | [M-H] <sup>-</sup> |                     |
| Cholic acid           | 5.7      | 407.2803           | 407.2809           | 391.2, 373.3, 345.2 |
| Deoxycholic acid      | 5.8      | 391.2854           | 391.2857           | 389.6, 343.3, 327.3 |
| Glycocholic Acid      | 5.8      | 464.3018           | 464.3016           | 402.4, 74.5         |
| Glycodeoxycholic acid | 6.2      | 448.3069           | 448.3072           | 330.2, 74.2         |
| PE (32:0)             | 16.5     | 690.5079           | 690.5082           | 454.2, 434.2, 255.1 |
| PE (34:1)             | 16.2     | 716.5236           | 716.5240           | 452.2, 281.3, 255.2 |

**Supplementary Table 6: Calibration curves and figures of selected biomarkers**

| Metabolites      | Regression equation | R2    | LLoQ (μM) | RSD (%) |
|------------------|---------------------|-------|-----------|---------|
| Citrate          | $y=417.4x-64.5$     | 0.995 | 0.3       | 99.5    |
| Malate           | $y=888.5x-80.4$     | 0.999 | 0.3       | 98.9    |
| Succinate        | $y=964.3x-277.5$    | 0.996 | 0.2       | 99.0    |
| Lysine           | $y=142.6x-20.1$     | 0.997 | 0.1       | 98.5    |
| Carnitine        | $y=297.6x+79.4$     | 0.996 | 0.36      | 99.1    |
| Proline          | $y=587x+45.35$      | 0.996 | 0.2       | 97.9    |
| Ornithine        | $y=803.7x-217.2$    | 0.995 | 0.18      | 99.6    |
| Serine           | $y=197.1x+46.5$     | 0.999 | 0.2       | 98.6    |
| Phenylalanine    | $y=694.9x-204.6$    | 0.995 | 0.36      | 97.8    |
| Tyrosine         | $y=646,768x+12,653$ | 0.996 | 0.4       | 98.5    |
| Arachidonic acid | $y=124.5x+30.9$     | 0.996 | 0.3       | 98.3    |
| Uric acid        | $y=923.3x-11.1$     | 0.997 | 0.32      | 96.9    |
| Arabinose        | $y=515.9x-36.7$     | 0.998 | 0.3       | 98.4    |
| Galactose        | $y=602.4x-62.4$     | 0.998 | 0.2       | 98.1    |

**Supplementary Table 7: The identified differential metabolites between HCC, HBV-cirrhosis and control**

See Supplementary File 2
